# Supplementary material for: Metal chloride anion based ionic liquids: synthesis, characterization and evaluation of performance in hydrogen sulfide oxidative absorption
Source: Royal Society of Chemistry journal article supplement (doi:10.1039/d2ra01494g), 2022-01-01
Supplement: d2ra01494g1.pdf [file d2ra01494g1.pdf]

## Supporting Information

### Metal Chloride-anion based Ionic Liquids: Synthesis, Characterization and Evaluation of Performances in Hydrogen Sulfide Oxidative Absorption

Muhammad Syahir Aminuddin<sup>1</sup>, Mohamad Azmi Bustam @ Khalil<sup>1,2</sup>, Bawadi Abdullah<sup>1,3\*</sup>

<sup>1</sup>Department of Chemical Engineering, Universiti Teknologi PETRONAS, 32610 Bandar Seri Iskandar, Perak, Malaysia

<sup>2</sup>Centre of Research in Ionic Liquids (CORIL), Universiti Teknologi PETRONAS, 32610 Bandar Seri Iskandar, Perak, Malaysia

<sup>3</sup>Centre of Contamination Control and Utilization (CenCoU), Universiti Teknologi PETRONAS, 32610 Bandar Seri Iskandar, Perak, Malaysia

\*Corresponding author: [bawadi\\_abdullah@utp.edu.my](mailto:bawadi_abdullah@utp.edu.my); [bawadi73@gmail.com](mailto:bawadi73@gmail.com)

#### Selection of MCABILs process by COSMO-RS screening method

In our previous work<sup>1</sup>, COSMO-RS was used to predict the Henry's law constants, activity coefficient and selectivity of a total 300 different types of MCAB ILs. In general, ILs can be designed by combining various kind of cations and anions. A total combination of 20 cations and 15 anions of chloride ion and metal chloride anions were chosen to form 300 different kinds of metal chloride anion based ILs, which covers almost all reported ILs and their derivatives. The wide range of cations and anions combinations were screened and predicted by COSMO-RS to determine the most efficient catalyst to perform oxidative absorption of H<sub>2</sub>S. The cations used were imidazolium, phosphonium, pyridinium and pyrrolidinium. The anions used were chloride and metal chloride anions such as silver, zinc, cobalt, copper, gold, titanium, iron, chromium, tin, platinum, aluminium, gallium, nickel and indium. Based on the performance index, PI predicted by COSMO-RS on 300 MCABILs' performance in H<sub>2</sub>S conversion, trihexyl(tetradecyl)phosphonium ion, [P<sub>66614</sub>]<sup>+</sup> and tetrabutyl(tetradecyl)phosphonium ion, [P<sub>44414</sub>]<sup>+</sup> were the two best cations of ILs after being compared with every anion in the screening process. However, recent findings revealed that ILs containing [P<sub>44414</sub>]<sup>+</sup> are extremely toxic and carcinogenic to human beings. Hence, its production is no longer continued worldwide. Therefore,

only trihexyl(tetradecyl)phosphonium cation,  $[P_{66614}]^+$  were chosen for synthesis. Meanwhile, tetrachlorogallate ion,  $[GaCl_4]^-$  is predicted as the best anion with the highest performance for  $H_2S$  conversion when paired with every cation during the screening process followed by tetrachloroindium ion,  $[InCl_4]^-$ , tetrachloroaluminate ion,  $[AlCl_4]^-$  and tetrachloroferrate ion,  $[FeCl_4]^-$ . In the economic value aspects, iron(III) chloride,  $FeCl_3$  and tin(II) chloride,  $SnCl_2$  are lower in cost compared to the rest of metal chlorides. Therefore, by considering various aspects of ILs selection such as  $H_2S$  conversion performance, safety reasons and economic value, 3 ILs has been selected for synthesis such as trihexyl(tetradecyl)phosphonium tetrachlorogallate,  $P_{66614}GaCl_4$ , trihexyl(tetradecyl)phosphonium tetrachloroferrate,  $P_{66614}FeCl_4$  and trihexyl(tetradecyl)phosphonium trichlorostannate,  $P_{66614}SnCl_3$ .

Table S1: Density values for MCABILs at 20°C

| ILs structure code    | Density( $\rho$ ), (g/cm <sup>3</sup> ) |
|-----------------------|-----------------------------------------|
| $[P_{66614}][GaCl_4]$ | 1.00274                                 |
| $[P_{66614}][FeCl_4]$ | 0.98470                                 |
| $[P_{66614}][SnCl_3]$ | 0.98139                                 |

Table S2: Viscosity data for MCABILs at 20 °C

| ILs structure code    | Viscosity, (cP) |
|-----------------------|-----------------|
| $[P_{66614}][GaCl_4]$ | 880.42          |
| $[P_{66614}][FeCl_4]$ | 712.66          |
| $[P_{66614}][SnCl_3]$ | 543.11          |

Table S3: Thermal onset,  $T_{Onset}$  and decomposition,  $T_{Decomposition}$  temperatures for each MCABILs

| ILs                   | $T_{onset}$ (°C) | $T_{decomposition}$ (°C) |
|-----------------------|------------------|--------------------------|
| $[P_{66614}][GaCl_4]$ | 459.19           | 480.34                   |
| $[P_{66614}][FeCl_4]$ | 431.18           | 478.57                   |
| $[P_{66614}][SnCl_3]$ | 425.50           | 468.77                   |

Table S4: Melting points of MCABILs

| ILs structure code                        | Melting point (°C) |
|-------------------------------------------|--------------------|
| [P <sub>66614</sub> ][GaCl <sub>4</sub> ] | 90.58              |
| [P <sub>66614</sub> ][FeCl <sub>4</sub> ] | 90.51              |
| [P <sub>66614</sub> ][SnCl <sub>3</sub> ] | 90.62              |

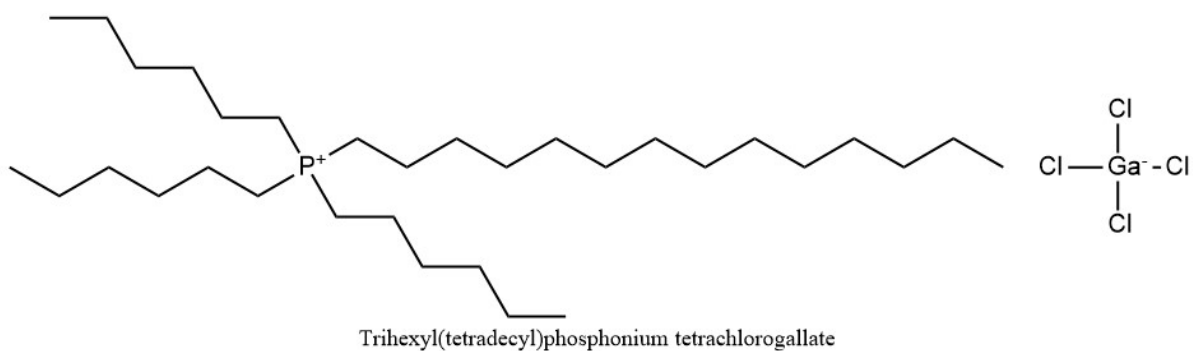

Fig. S1: P<sub>66614</sub>GaCl<sub>4</sub> structure

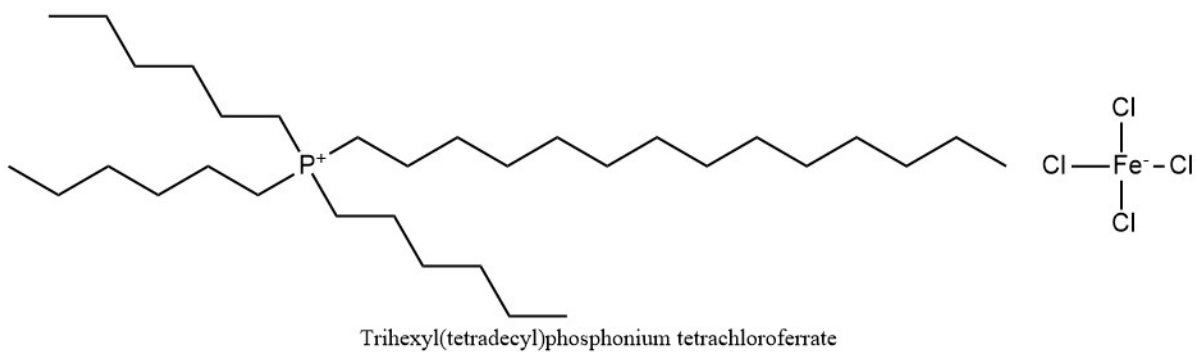

Fig. S2: P<sub>66614</sub>FeCl<sub>4</sub> structure

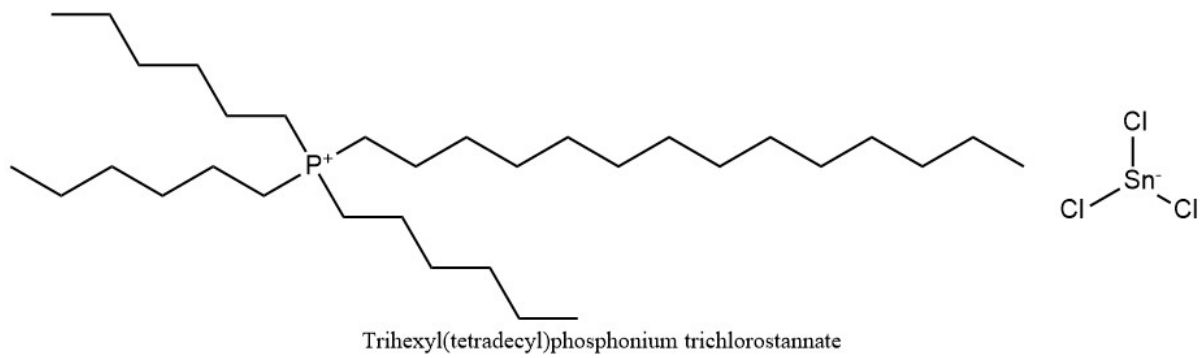

Fig. S3:  $P_{66614}SnCl_3$  structure

### References

1. M. S. Aminuddin, Z. Man, M. A. Bustam Khalil and B. Abdullah, *E3S Web Conf.*, 2021, **287**, 02003.
